# Supplementary material
Source: HighWire-hosted journal article supplement (http://www.ajevonline.org/highwire/filestream/1908/field_highwire_adjunct_files/0/13-003SuppData.pdf)
Supplement: 13-003SuppData.pdf [file 13-003SuppData.pdf]

## Supplemental Data for:

Pegram, Z., M.T. Kwasniewski, and G.L. Sacks. 2013.  
Simplified method for free SO<sub>2</sub> measurement using gas detection tubes.  
Am. J. Enol. Vitic. 64:405-410. doi: 10.5344/ajev.2013.13003.

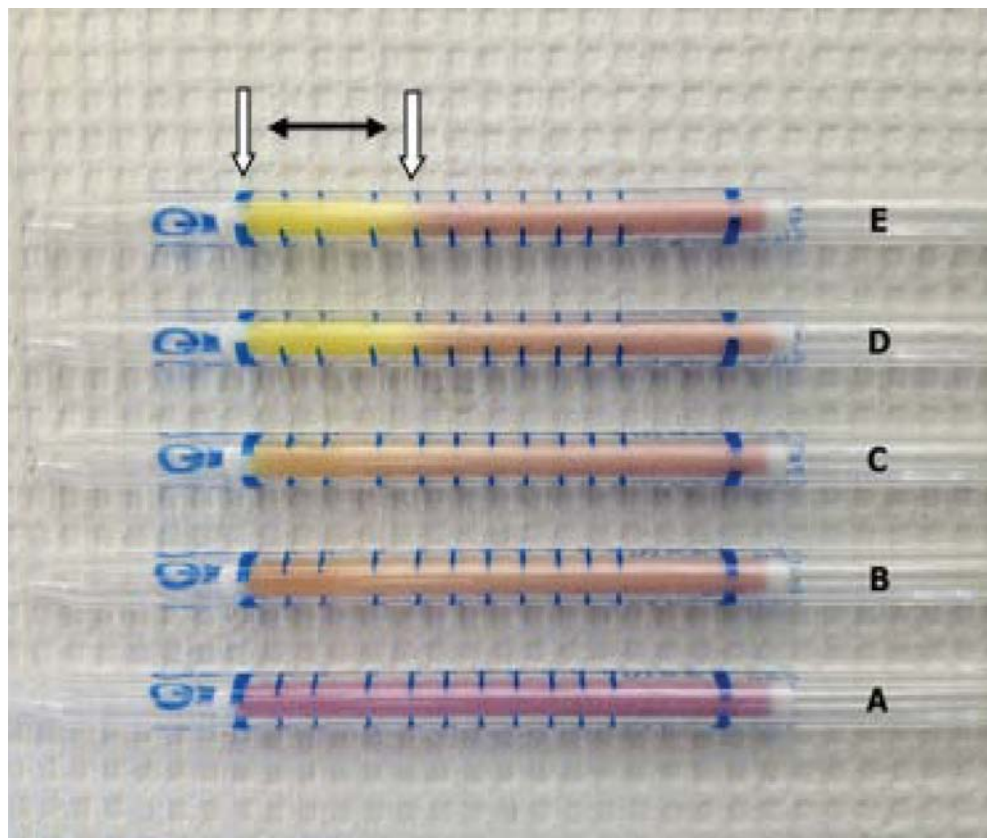

**Supplemental Figure 1** Color change in Gastec 5M tubes. **A:** Tube prior to use. **B:** Tube after two assays on blank solutions, then 15 min rest. **C:** Tube after two assays on blank solutions with no rest. Discoloration from purple to orange is due to CO<sub>2</sub> gas. **D:** Tube after two runs: one blank model wine and one model wine with 35 mg/L free SO<sub>2</sub>. **E:** Tube after a single run of a model wine with 35 mg/L free SO<sub>2</sub>. The distance between the white arrows indicates the discoloration length, where Free SO<sub>2</sub> (mg/L) = 1.84 \* Length (mm).

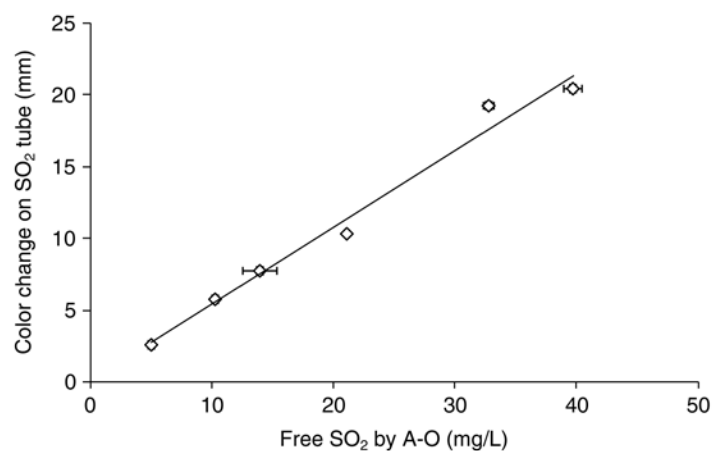

**Supplemental Figure 2** Calibration plot of SO<sub>2</sub> tube color change (mm) vs. free SO<sub>2</sub> by A-O (mg/L) for SO<sub>2</sub> standards in model wine. Error bars represent standard deviations (n = 2). The best fit line equation was  $y = 0.543x + 0.0033$  ( $r^2 = 0.99$ , 1/x weighting). The y-intercept was ignored because it was negligible, resulting in the relationship: Free SO<sub>2</sub> (mg/L) = 1.84 \* Length (mm).
